# Lipoprotein CD0873 Is a Novel Adhesin of *Clostridium difficile*

Andrea Kovacs-Simon,<sup>1</sup> Rosanna Leuzzi,<sup>2</sup> Magdalena Kasendra,<sup>2</sup> Nigel Minton,<sup>3</sup> Richard W. Titball,<sup>1</sup> and Stephen L. Michell<sup>1</sup>

<sup>1</sup>Biosciences, College of Life and Environmental Sciences, University of Exeter, and <sup>3</sup>Clostridia Research Group, School of Molecular Medical Sciences, Centre for Biomolecular Sciences, University of Nottingham, United Kingdom; and <sup>2</sup>Research Center, Novartis Vaccines and Diagnostics, Siena, Italy

***Clostridium difficile* is a cause of antibiotic-associated diarrhea and colitis, a healthcare-associated intestinal disease. Colonization of the gut is a critical step in the course of infection. The *C. difficile* lipoprotein CD0873 was identified as a putative adhesin through a bioinformatics approach. Surface exposure of CD0873 was confirmed and a CD0873 mutant was generated. The CD0873 mutant showed a significant reduction in adherence to Caco-2 cells and wild-type bacteria preincubated with anti-CD0873 antibodies showed significantly decreased adherence to Caco-2 cells. In addition, we demonstrated that purified recombinant CD0873 protein alone associates with Caco-2 cells. This is the first definitive identification of a *C. difficile* adhesin, which now allows work to devise improved measures for preventing and treating disease.**

**Keywords.** adhesion; lipoprotein; ABC-type transporter; CD0873; Bacteria; *Clostridium difficile*.

The gram-positive, anaerobic, spore-forming bacterium *Clostridium difficile* is a major cause of antibiotic-associated diarrhea and colitis and is a significant burden to healthcare services across Europe and North America [1, 2]. *C. difficile* infection (CDI) results in an estimated cost of \$1.1 billion per year in the United States alone, as a consequence of patient treatment and time spent in hospital [3]. Gastrointestinal carriage of *C. difficile* may be asymptomatic or lead to disease, ranging from mild diarrhea to, at worst, potentially fatal pseudomembranous colitis [4]. CDI is primarily mediated by 2 large clostridial toxins (TcdA and TcdB), which cause fluid accumulation in the gut, inflammation, and destruction of the intestinal epithelium [5]. In addition, a binary toxin, CDT, is produced by several strains and has been suggested to induce morphological

changes in intestinal epithelial cells, facilitating mucosal association of *C. difficile* [6].

Colonization is an early and critical step in the pathogenic process of *C. difficile*. In a hamster infection model, colonization by a nontoxigenic strain of *C. difficile* prevented animals from developing disease following a subsequent challenge with a toxigenic strain [7]. The interactions of bacterial surface proteins with intestinal tissues of the host may facilitate adherence of this pathogen to the gut. Therefore, surface proteins as colonization factors may contribute to the virulence of *C. difficile* [5]. Although a number of colonization factors have been identified and characterized in other bacterial pathogens, little is known about the colonization mechanisms of *C. difficile*. To date, several putative adhesins have been proposed [8–11], but as yet a genetic approach has not supported the role of these molecules in adherence.

Previous studies have shown that lipoprotein components of ABC-type transporters are frequently associated with the attachment of pathogenic bacteria, including group B *Streptococcus* [12], *Brucella* species [13], and *Agrobacterium tumefaciens* [14], to host cells. The multifunctional lipoprotein PsaA (protein surface antigen A) of *Streptococcus pneumoniae* is one of the best characterized ABC-transporter lipoprotein adhesins and is currently extensively studied as a

Received 14 August 2013; accepted 21 January 2014; electronically published 29 January 2014.

Presented in part: 4th International *Clostridium difficile* Symposium, Bled, Slovenia, 20–22 September 2012.

Correspondence: Stephen L. Michell, PhD, Rm 405, Biosciences, College of Life and Environmental Sciences, University of Exeter, Geoffrey Pope Bldg, Stocker Rd, Exeter, Devon, United Kingdom, EX4 4QD (s.l.michell@exeter.ac.uk).

**The Journal of Infectious Diseases** 2014;210:274–84

© The Author 2014. Published by Oxford University Press on behalf of the Infectious Diseases Society of America. All rights reserved. For Permissions, please e-mail: journals.permissions@oup.com.

DOI: 10.1093/infdis/jiu070

potential vaccine component [15]. Apart from PsaA, PpmA, and SlrA are 2 other lipoproteins of *S. pneumoniae* that have been shown to contribute to virulence by promoting pneumococcal colonization [16, 17]. Furthermore, the extracellular matrix binding proteins DbpA (decorin) and BmpA (laminin), as well as OmpA, are all lipoproteins of *Borrelia burgdorferi* that have a contributory role in adherence [18–20]. Similarly, the adhesin BopA of *Bifidobacterium bifidum* [21] is a lipoprotein, as is the well-characterized adhesin IlpA of *Vibrio vulnificus* [22]. Numerous studies have demonstrated the contribution of lipoproteins to adherence of various bacterial pathogens, highlighting their importance in virulence, and these have been reviewed elsewhere [23].

To date, no study has investigated the role of the lipoproteins of *C. difficile* in adherence. In this work, we investigated whether a novel lipoprotein of *C. difficile*, CD0873, is involved in adhesion to host cells. We demonstrate that CD0873 is exposed at the bacterial cell surface and that the adherence of *C. difficile* to host cells is affected by mutation of the gene encoding CD0873. Moreover, we used antibodies against CD0873 to demonstrate the specificity of this adherence, providing additional support to the role of CD0873 as an adhesin of *C. difficile*.

## MATERIALS AND METHODS

### Bioinformatic Analysis

Lipoproteins of *C. difficile* 630 (RefSeq: NC\_009089) were identified by the following criteria: (1) all phosphatidate cytidylyl-transferase signatures were matched against the PROSITE pattern PS00013/PDOC00013, implemented as the PERL regular expression: [ACFGHILMNOPQSTUVXYZ]{6}[LIVMFWSGAG]{2}[LIVMFYSTAGCQ][AGS]C/[24]; (2) presence of a cysteine residue between the 15th and 35th amino acids; and (3) presence of at least 1 lysine or 1 arginine in the first 7 residues. The presence of a signal peptide was checked using SignalP 3.0 [25]. Sequence alignment of amino acid sequences was performed with CloneManager, using BLOSUM62 as a scoring matrix.

### Bacterial Strains and Growth Conditions

*C. difficile* strains were grown at 37°C in an anaerobic workstation (Don Whitley, United Kingdom) in an atmosphere of 10% CO<sub>2</sub>, 10% H<sub>2</sub>, and 80% N<sub>2</sub>, using prereduced brain heart infusion broth or agar (Oxoid). *Escherichia coli* strains were routinely cultured in Luria-Bertani (LB) broth or on LB agar. When appropriate, antibiotics were added at the following concentrations: kanamycin, 50 µg/mL; tetracycline, 10 µg/mL; chloramphenicol, 12.5 µg/mL (broth) and 25 µg/mL (agar); cycloserine, 250 µg/mL; ceftioxin, 8 µg/mL; thiamphenicol, 15 µg/mL; and erythromycin, 5 µg/mL. Strains, plasmids, and primers used in this study are described in Table 1.

### Purification of Recombinant CD0873 Protein

Expression clones were generated by polymerase chain reaction (PCR), using primers pNIC\_CD0873-F and pNIC\_CD0873-R (Table 1) and ligation-independent cloning into vector pNIC28-Bsa4 [30]. The resultant pNIC-KSA1 plasmid was transformed into *Escherichia coli* C43(DE3) [28]. The histidine-tagged CD0873 was overexpressed by IPTG induction (0.5 mM), purified with a His-Bind kit (Novagen), and cleaved by TEV protease (Promega).

### Production of CD0873-Specific Antibodies

All antisera were generated commercially (Enzo Life Sciences). Rabbits received a 50-µg dose of CD0873 7 times at 2-week intervals.

### Protein Analysis

Whole-cell lysates of *C. difficile* were prepared as described previously [32]. Subsequent extraction with Triton X-114 enriched for hydrophobic proteins [33]. Protein samples (whole-cell lysates and aqueous- and detergent-phase proteins) were Western blotted and probed with CD0873-specific primary antibody (dilution, 1:2500) and anti-rabbit immunoglobulin G (IgG) horseradish peroxidase (dilution, 1:2000) secondary antibody (Cell Signaling Technology). Blots were developed using LumiGLO chemiluminescent substrate (Cell Signaling Technology) and visualized using the Bio-Rad ChemiDoc system (Bio-Rad Laboratories).

### Immunofluorescence Microscopy

Bacteria were washed with phosphate-buffered saline (PBS), fixed in 3.7% (w/v) paraformaldehyde (Sigma), and immobilized on poly-D-lysine slides. Slides were blocked with 3% (w/v) bovine serum albumin (BSA; Sigma) in PBS for 1 hour, incubated with CD0873-specific primary antibody (1:500) for 1 hour, and washed with PBS. Slides were then incubated with Alexa Fluor 568-labeled goat anti-rabbit IgG (dilution, 1:1000; Molecular Probes). Labeled samples were mounted with ProLong Gold antifade reagent with DAPI (Molecular Probes) and analyzed with a Zeiss LSM710 confocal microscope.

### Generation and Complementation of a CD0873 Mutant of *C. Difficile*

A CD0873 mutant of *C. difficile* 630Δerm (KSA1) was produced using the ClosTron system [34]. Vector pMTL-KSA1, retargeted for the gene encoding CD0873, was purchased from DNA2.0. Putative mutants were screened using CD0873 gene-specific primers (CD0873-F and CD0873-R; Table 1) and verified by sequencing the amplicons. For complementation studies, the CD0873 gene and 20-bp of the 5' region encompassing the Shino-Dalgarno sequence were amplified from genomic DNA, using Compl\_CD0873-F and Compl\_CD0873-R primers (Table 1). The PCR product was cloned into a pMTL960-based

**Table 1. Strains, Plasmids, and Primers Used in This Study**

| Strains             | Description                                                                                                                                     | Reference  |
|---------------------|-------------------------------------------------------------------------------------------------------------------------------------------------|------------|
| <i>C. difficile</i> |                                                                                                                                                 |            |
| 630Δ <i>erm</i>     | <i>C. difficile</i> wild-type strain                                                                                                            | [26]       |
| KSA1                | <i>C. difficile</i> CD0873:: <i>ermB</i> ::317;318; Ery <sup>r</sup>                                                                            | This study |
| KSA2                | <i>C. difficile</i> CD0873:: <i>ermB</i> ::317;318, carrying pMTL960-CD0873; Ery <sup>r</sup> , Thi <sup>r</sup>                                | This study |
| <i>fliC</i> mutant  | <i>C. difficile</i> <i>fliC</i> :: <i>ermB</i> ::515;516; Ery <sup>r</sup>                                                                      | [27]       |
| <i>E. coli</i>      |                                                                                                                                                 |            |
| DH5α                | Cloning host                                                                                                                                    | Invitrogen |
| C43(DE3)            | Expression host                                                                                                                                 | [28]       |
| CA434               | Conjugation donor; Kan <sup>r</sup> , Tet <sup>r</sup>                                                                                          | [29]       |
| Plasmids            |                                                                                                                                                 |            |
| pNIC28-Bsa4         | His-tag protein expression vector; Kan <sup>r</sup>                                                                                             | [30]       |
| pNIC-KSA1           | pNIC28 carrying CD0873                                                                                                                          | This study |
| pMTL007C-E2         | Shuttle vector; Chl <sup>r</sup> , Thi <sup>r</sup>                                                                                             | [31]       |
| pMTL-KSA1           | pMTL007C-E2 carrying the targeted intron for CD0873 at 317;318 site                                                                             | This study |
| pRPF144             | pMTL960-based shuttle plasmid vector carrying the promoter of the <i>cwp</i> gene and the <i>gusA</i> gene, Chl <sup>r</sup> , Thi <sup>r</sup> | [32]       |
| pMTL-KSA2           | pRPF144 carrying the CD0873 gene (instead of <i>gusA</i> )                                                                                      | This study |
| Primers (5' to >3') |                                                                                                                                                 |            |
| pNIC_CD0873-F       | TACTTCCAATCCATGGCTTCACAAGGAGGAGACTCTGG                                                                                                          |            |
| pNIC_CD0873-R       | TATCCACCTTTACTGTCACTTCTGTTTAGTCTTTACAT                                                                                                          |            |
| CD0873-F            | CAGCATTAGATGCCACTAGG                                                                                                                            |            |
| CD0873-R            | GCAGCAACAGGGTCACTCAC                                                                                                                            |            |
| CompI_CD0873-F      | GAGCTCTTTTTGAGGGGGATATAAAAATG                                                                                                                   |            |
| CompI_CD0873-R      | GGATCCCTATTCTTGTGTTAGTCTTTAC                                                                                                                    |            |
| RT-PCR_maa-F        | TGTTGTCTGGGAAAGGATAC                                                                                                                            |            |
| RT-PCR_maa-R        | TGGATTCCAACAGCTACAG                                                                                                                             |            |
| RT-PCR_CD0873-F     | GCTGGTGCTCTTAGTATATC                                                                                                                            |            |
| RT-PCR_CD0873-R     | GATGTAGCCACAGGCATATC                                                                                                                            |            |
| RT-PCR_CD0874-F     | GGAACCTGCCCTTCTATGAC                                                                                                                            |            |
| RT-PCR_CD0874-R     | GGGTCAAGTGCTGCTGTATG                                                                                                                            |            |

Abbreviations: *C. difficile*, *Clostridium difficile*; *E. coli*, *Escherichia coli*.

shuttle plasmid (pRPF144) containing the native promoter of the *cwp2* gene, resulting in the plasmid pMTL-KSA2 [32]. pMTL-KSA2 was transformed into *E. coli* CA434 and conjugated into the KSA1 to generate KSA2.

### Adherence Assay

Caco-2 cells were used between passages 54 and 69 and cultured in Eagle's minimal essential medium (EMEM; PromoCell, Heidelberg, Germany) supplemented with 10% fetal bovine serum (SAFC, Sigma-Aldrich) and 1% MEM nonessential amino acids (NEAA; Life Technologies) in a humidified 5% CO<sub>2</sub> atmosphere at 37°C. Cells were seeded at 7 × 10<sup>4</sup> cells per well in 24-well tissue culture plates or on collagen I-coated chamber slides (BD Biotac) for immunofluorescence microscopy. Monolayers were used 8 days after seeding. The culture medium was replaced with nonsupplemented EMEM 24 hours before infection. Bacterial suspensions for infection of Caco-2 cells were prepared in

prereduced EMEM, and adherence experiments were conducted under anaerobic conditions. Caco-2 monolayers were infected at a multiplicity of infection of 5 or 100. After 2 hours of incubation, nonadherent bacteria were removed by pipetting, and cells were washed 3 times with PBS. For the adherence-blocking experiments, bacterial cells were preincubated with CD0873 antisera for 30 minutes at various dilutions. Adherence of *C. difficile* was determined by 3 methods. First, colony-forming units (CFUs) were counted, wherein washed cells were resuspended in 1 mL of brain heart infusion broth, and the counts of adherent CFU were determined by plating. Second, an on-cell Western assay was performed. Here, Caco-2 cells with the adhered bacteria were fixed with 5% paraformaldehyde (Fisher Scientific) for 25 minutes at room temperature. Cells were washed 5 times with PBS and blocked overnight at 4°C with Odyssey blocking buffer (LI-COR). Cells were then incubated with anti-*C. difficile* antibodies (dilution, 1:2500;

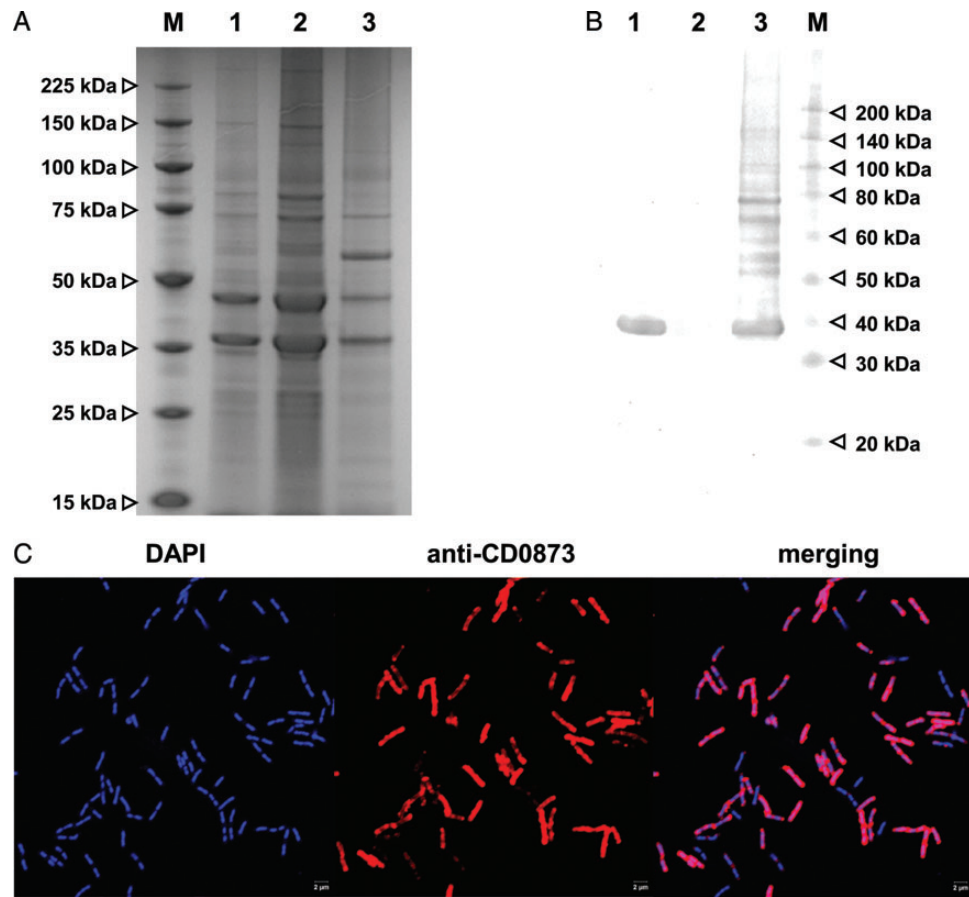

**Figure 1.** The CD0873 lipoprotein is exposed to the surface of *Clostridium difficile*. *A*, Sodium dodecyl sulfate–polyacrylamide gel electrophoresis of the whole-cell lysate and aqueous- and detergent-phase proteins of the wild-type *C. difficile* 630 $\Delta$ *erm* cells. *B*, Western blot analysis of the whole-cell lysate and aqueous- and detergent-phase proteins of the wild-type *C. difficile* 630 $\Delta$ *erm* cells, using anti-CD0873 antibodies. The CD0873 lipoprotein was detected in the detergent phase but not in the aqueous phase of the *C. difficile* 630 $\Delta$ *erm* cell lysate. Lane M, protein molecular weight marker (in kDa); lane 1, whole-cell lysate; lane 2, aqueous phase; lane 3, detergent phase. *C*, Immunofluorescence microscopy of the *C. difficile* 630 $\Delta$ *erm* strain, using anti-CD0873 antibodies and Fluor568-conjugated anti-rabbit secondary antibodies (red). DNA was stained with DAPI (blue). The CD0873 antibodies were able to bind to whole *C. difficile* 630 $\Delta$ *erm* wild-type cells.

antibody was raised against whole cells of *C. difficile* 630, kindly provided by Prof N. Fairweather) for 1 hour, followed by incubation with IRdye 680LT goat anti-rabbit IgG (LI-COR; dilution, 1:2000) for 1 hour in the dark. Wells were washed with PBS, and fluorescence was measured by the Odyssey CLx infrared scanner (LI-COR). Third, immunofluorescence microscopy was conducted. In this method, cells were fixed with 3.7% paraformaldehyde (Sigma) for 15 minutes, washed, and blocked with 3% BSA in PBS for 1 hour. Slides were then incubated with anti-*C. difficile* antibodies (dilution, 1:1000) for 1 hour. Cells were then washed and incubated with Alexa Fluor 488 goat anti-rabbit IgG and Alexa Fluor 568-phalloidin (dilutions, 1:1000 and 1:400, respectively) (Molecular Probes) for 1 hour. After successive washes with PBS, slides were mounted with ProLong Gold antifade reagent with DAPI (Molecular Probes) and analyzed with a Zeiss LSM710 confocal microscope.

### Protein Binding Assays

These experiments were performed under aerobic conditions. After removal of EMEM and washing with PBS, Caco-2 cells were incubated with 1 mL of EMEM containing 100  $\mu$ g of recombinant protein. After 3 washes with PBS, cells were disrupted with 200  $\mu$ L of lysis buffer (0.8% sodium dodecyl sulfate in PBS) and boiled for 10 minutes. A 15- $\mu$ L volume of the lysate was then subjected to Western blot analysis using anti-CD0873 and anti-His antibodies.

## RESULTS

### Identification of the CD0873 Lipoprotein

We first analyzed the genome of *C. difficile* strain 630 and identified 86 genes predicted to encode lipoproteins. We compared this list with the reported data on genes that are upregulated

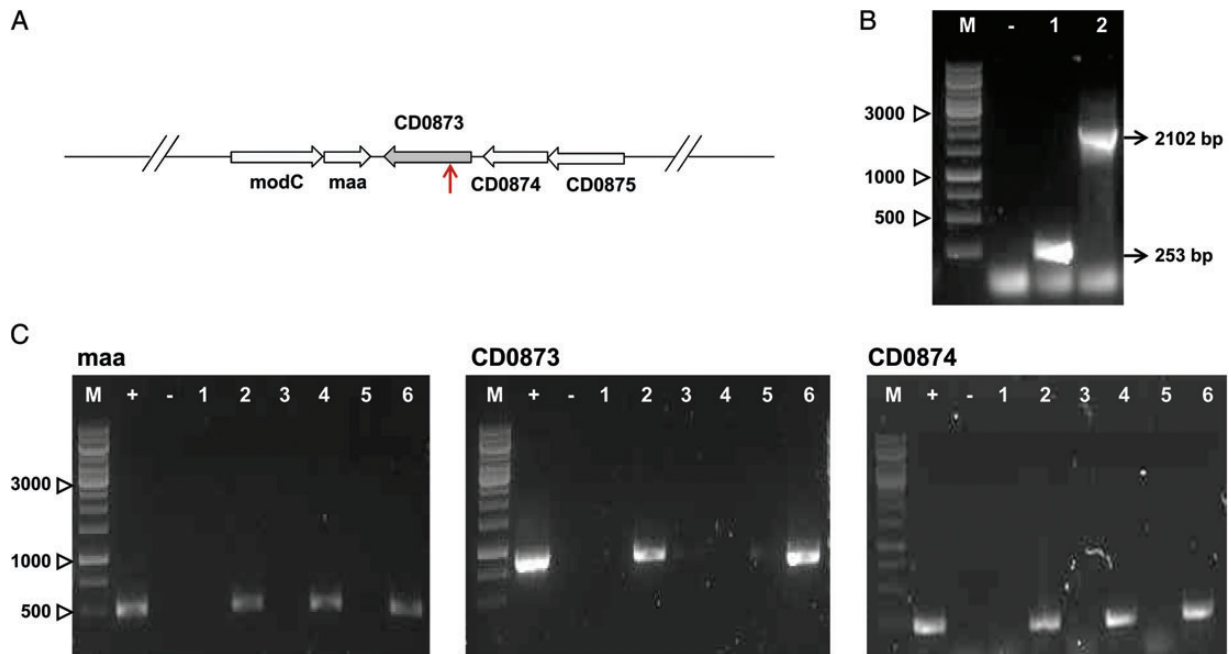

**Figure 2.** Construction and confirmation of the CD0873 mutant of *Clostridium difficile*. *A*, Schematic representation of the CD0873 region on the chromosome of *C. difficile*. The red arrow indicates the insertion site of the group II intron (1749 bp) into the CD0873 gene in the KSA1 strain (between the 317th and 318th bps). *B*, Confirmation of the CD0873 mutant by polymerase chain reaction (PCR), using CD0873-F and CD0873-R primers. Lane M, DNA ladder (in bp); lane 1, 630 $\Delta$ erm (253 bp); lane 2, KSA1 (2102 bp); –, water (negative) control. Sizes of the PCR products are indicated in brackets. *C*, Transcriptional analysis of the CD0873 gene and the genes upstream (CD0874) and downstream (*maa*) of the CD0873 gene in the 630 $\Delta$ erm, KSA1, and KSA2 strains by reverse-transcription PCR (RT-PCR), using RT-PCR primer pairs (Table 1). Lane M, DNA ladder (in bp); +, 630 $\Delta$ erm DNA (positive) control; –, water (negative) control; lanes 1, 3, and 5, DNase treated RNA; lanes 2, 4, and 6, complementary DNA; lanes 1 and 2, 630 $\Delta$ erm; lanes 3 and 4, KSA1; lanes 5 and 6, KSA2. Sizes of the RT-PCR products are as follows: *maa*-RT F, R: 509 bp; CD0873-RT F, R: 884 bp; and CD0874-RT F, R: 255 bp. This analysis demonstrated that the mutation present in KSA1 did not affect the transcription of the CD0874 and the *maa* genes.

during infection of Caco-2 cells [35] and identified CD0873. The CD0873 gene product is predicted to be 340 amino acids and to contain a 23–amino acid lipoprotein signal peptide cleavage motif. The predicted CD0873 product showed 21% sequence identity to *S. pneumoniae* PsaA.

#### CD0873 Is a Lipoprotein Exposed on the Cell Surface of *C. difficile*

To test the hypothesis that CD0873 is a lipoprotein with a role in adhesion, we investigated the cellular localization of the protein. After extraction with Triton X114 [33], integral membrane proteins, including lipoproteins, partition to the detergent phase. Using immunoblotting, we showed that CD0873 partitioned into the detergent phase of a Triton X-114 extract of *C. difficile* (Figure 1B). This finding is consistent with the proposed annotation of CD0873 as a lipoprotein. Using immunofluorescence microscopy, we demonstrated the surface localization of CD0873 on *C. difficile* (Figure 1C).

#### Construction of a CD0873 Mutant Strain

To further investigate the role of CD0873, we generated a CD0873 mutant (KSA1), using the ClosTron insertional

mutagenesis system (Figure 2A). To confirm the genotype of the CD0873 mutant, erythromycin-resistant colonies were picked and analyzed by PCR (Figure 2B). The primers CD0873-F and CD0873-R (Table 1) amplified a 2102-bp DNA fragment from KSA1, and a 253-bp amplicon was obtained from the wild-type strain. DNA sequencing of the PCR product from the mutant confirmed integration at the target site. This mutant was complemented with plasmid pMTL-KSA2 (Table 1) to create strain KSA2. To further validate the mutants, reverse-transcription PCR analysis of genes upstream and downstream of the CD0873 locus was performed (Figure 2C). This showed that CD0873 messenger RNA could be detected in the wild-type strain and KSA2 but not in KSA1. The genes upstream (CD0874) and downstream (*maa*) of CD0873 were similarly expressed in the wild-type, KSA1, and KSA2 strains. The growth rates of the wild-type, KSA1, and KSA2 strains in broth were similar (data not shown).

Immunoblot analysis using antisera against CD0873 showed that CD0873 expression could be detected in the wild-type strain and KSA2 but not in KSA1 (Figure 3B). This antisera was also used to demonstrate the cellular localization of CD0873 by immunofluorescence microscopy. As expected,

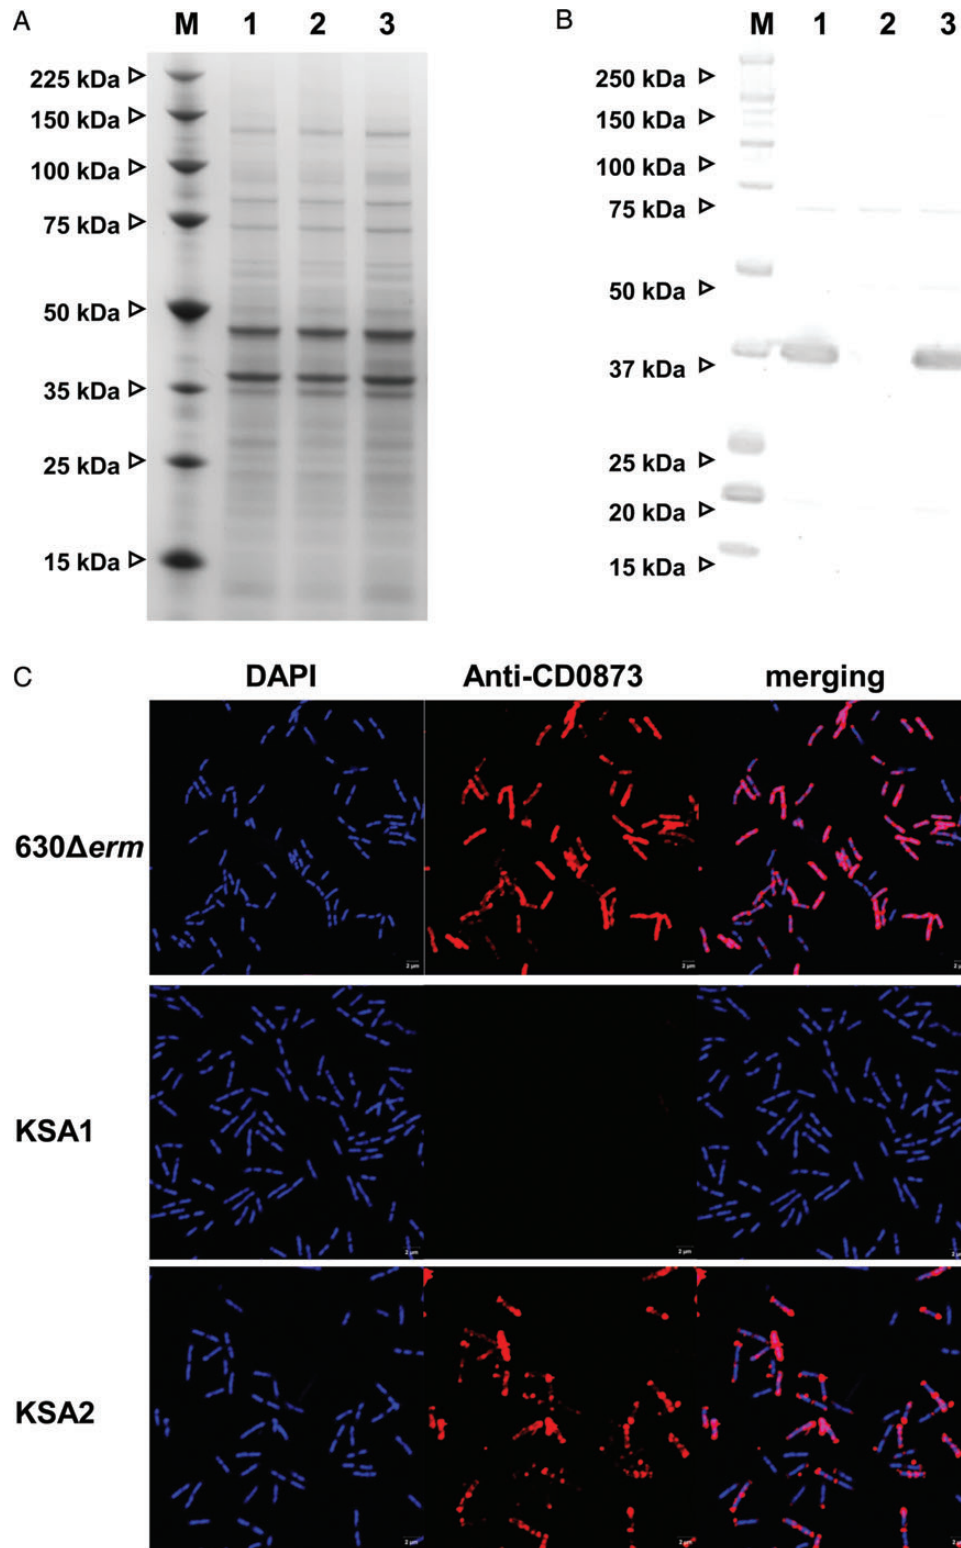

**Figure 3.** The CD0873 lipoprotein is not expressed in the CD0873 mutant of *Clostridium difficile*. *A*, Sodium dodecyl sulfate–polyacrylamide gel electrophoresis of the whole-cell lysates of the 630Δ*erm*, KSA1, and KSA2 strains. *B*, Western blot analysis of the whole-cell lysates of the 630Δ*erm*, KSA1, and KSA2 strains, using anti-CD0873 antibodies. The CD0873 lipoprotein was detected in 630Δ*erm* and KSA2 but not in KSA1. Lane M, protein molecular weight marker (in kDa); lane 1, 630Δ*erm*; lane 2, KSA1; lane 3, KSA2. *C*, Immunofluorescence microscopy of the 630Δ*erm*, KSA1, and KSA2 cells, using anti-CD0873 antibodies and Fluor568-conjugated anti-rabbit secondary antibodies (red). DNA was stained with DAPI (blue). The CD0873 antibodies were able to bind to whole *C. difficile* 630Δ*erm* wild-type and KSA2 cells but not to KSA1 cells.

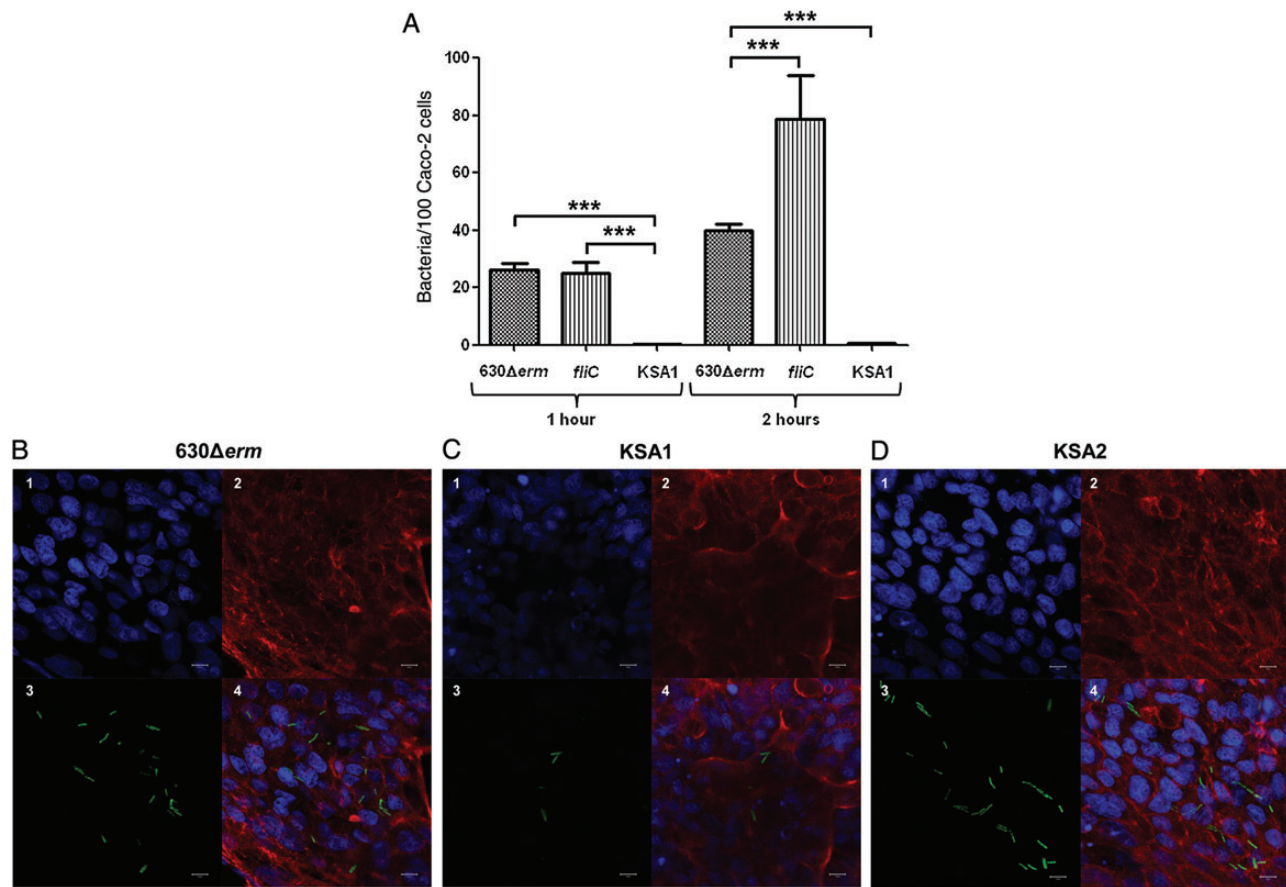

**Figure 4.** Inactivation of the CD0873 gene causes reduced adherence of *Clostridium difficile* to Caco-2 cells. *A*, Adherence of the *C. difficile* 630Δerm, *fliC* mutant, and KSA1 to Caco-2 monolayers, measured by colony-forming unit counts. Caco-2 cells were infected with the *C. difficile* strains (multiplicity of infection, 1:5) and incubated for 1 and 2 hours. The values are mean numbers of the adherent bacteria (with standard errors of the mean) per 100 Caco-2 cells of 4 separate experiments performed in triplicate. Statistical comparison of the value for 630Δerm to the value for *fliC* and KSA1 was performed by 1-way analysis of variance. \*\*\* $P < .0001$ . *B*, Adherence of *C. difficile* 630Δerm, KSA1, and KSA2, assessed by confocal immunofluorescence microscopy. Caco-2 cells were incubated with the *C. difficile* strains (multiplicity of infection, 1:100) for 2 hours. Adherent bacteria were labeled by anti-*C. difficile* primary antibodies and secondary fluorescent antibodies (Alexa488, green). DNA and cellular actin were stained with DAPI (blue) and phalloidin-Alexa568 (red), respectively. The scale bar indicates 10  $\mu\text{m}$ .

there was no signal from KSA1. Wild-type and KSA2 bacteria reacted strongly with antisera, indicating that the protein is surface located (Figure 3C).

#### Mutation of CD0873 Abolishes Adherence of *C. difficile* to Caco-2 Cells

To investigate whether CD0873 is an adhesin of *C. difficile*, the strain KSA1 was compared to the wild-type strain for its ability to adhere to Caco-2 cells. In an initial experiment, we showed, by use of an MTT assay, that a mean percentage ( $\pm$ SD) of  $97.67\% \pm 0.6578\%$  Caco-2 cells remained viable after 2 hours relative to their viability when grown aerobically ( $P = .0885$ , by the 2-tailed *t* test). On average, 26 or 40 wild-type *C. difficile* cells adhered to 100 Caco-2 cells after 1 and 2 hours, respectively (Figure 4A). In the same experiment, we found a significant

reduction in the number of KSA1 bacteria that adhered to Caco-2 cells after 1 hour and 2 hours ( $<1$  and 1 bacteria at 1 and 2 hours, respectively;  $P < .0001$ , by 1-way analysis of variance). A *fliC* mutant of *C. difficile* 630Δerm, which shows increased adherence [27], was used as a control in our studies and showed the expected phenotype (79 bacteria per 100 Caco-2 cells after 2 hours of incubation). We were unable to observe a restoration of adherence with KSA2 by CFU counting, even though CD0873 is expressed in this complemented strain.

The role of CD0873 in adherence was thus further investigated by visualizing the adherence of *C. difficile* strains to Caco-2 cells by immunofluorescence microscopy. Compared with the wild-type strain, the adherence of *C. difficile* KSA1 was reduced (Figure 4B). In this assay, adherence was restored to wild-type levels in KSA2 (Figure 4C).

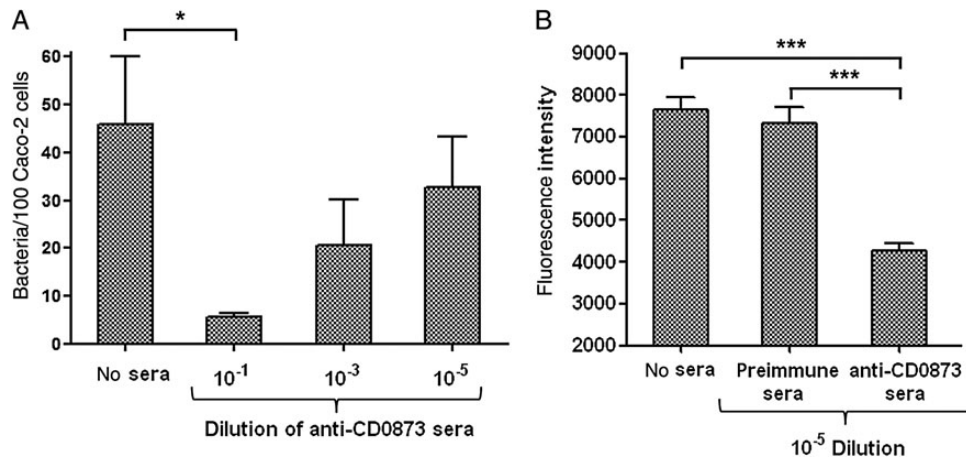

**Figure 5.** Adherence of *Clostridium difficile* to Caco-2 cells is inhibited by CD0873 antibodies. *A*, Adherence of wild-type *C. difficile* to Caco-2 monolayers after the bacterial cells were preincubated with CD0873 antisera. Cell-binding was measured by colony-forming unit counts. The values are mean numbers of the adherent bacteria per 100 Caco-2 cells. The assay was performed in duplicate in 3 independent experiments. The presented values are mean numbers (with standard errors of the mean). \* $P = .0132$ , compared with no-sera control, by the 2-tailed  $t$  test. *B*, Adherence of wild-type *C. difficile* to Caco-2 monolayers after preincubation of the bacteria with either CD0873 antisera or preimmune sera. Cell binding was determined by on-cell Western assay by measuring the fluorescence intensity, as described in Materials and Methods. Intensities indicated on the graph are normalized to the intensities measured with the Caco-2 cells-only control. \*\*\* $P < .001$ , by 1-way analysis of variance ( $n = 5$ ).

### Cytoadherence of *C. difficile* Is Inhibited by Anti-CD0873 Antibodies

Based on the observation that *C. difficile*, which does not express CD0873 on its surface, is deficient in adhering to Caco-2 cells, we tested the ability of antisera against CD0873 to inhibit bacterial adherence to Caco-2 cells (Figure 5A). Before the adherence assay, *C. difficile* was treated with serially diluted antisera ( $10^{-1}$ ,  $10^{-3}$ , and  $10^{-5}$ ), using EMEM as diluent. As a control, EMEM only was used for pretreatment of the bacterial cells. When *C. difficile* was preincubated with CD0873-specific antisera, the number of bacteria bound to the cells was lower with each antibody dilution relative to the control ( $P = .0132$ , by the 2-tailed  $t$  test, no sera) and the number of adhered bacteria decreased in a dose dependent manner. The role of the CD0873 lipoprotein in the adherence of *C. difficile* was further confirmed by an on-cell Western assay, another technique used for binding assays (Figure 5B). Wild-type *C. difficile* was treated for 30 minutes with either CD0873 immune sera or preimmune sera at the same concentrations or without any rabbit sera (EMEM only). In contrast to the preimmune sera, when the wild-type bacteria were pretreated with the immune sera, the level of adherence was significantly reduced relative to the no-sera control. These results show that anti-CD0873 antibodies inhibit adherence of *C. difficile* to Caco-2 cells and support the hypothesis that lipoprotein CD0873 is an adhesin of *C. difficile*.

### CD0873 Binds Directly to Caco-2 Cells

To further investigate whether CD0873 has a direct or indirect role in adhesion, the interaction of the recombinant CD0873

protein (Figure 6B) with Caco-2 cells was tested. A recombinant form of the  $\epsilon$ -prototoxin from *Clostridium perfringens* was used as a negative control. After 2 hours of incubation with the proteins and subsequent washing, the cells were lysed, and Western blotted was performed using anti-CD0873 antibodies. There was no signal from cells incubated with medium only or with  $\epsilon$ -prototoxin (Figure 6D). However, there was association of recombinant CD0873 protein to Caco-2 cells. Staining of the proteins separated by sodium dodecyl sulfate-polyacrylamide gel electrophoresis showed that similar levels of Caco-2 cell lysates were loaded (Figure 6C).

## DISCUSSION

It is widely reported that colonization is crucial in *C. difficile* infection. Previous studies suggested that adherence of *C. difficile* to the gastrointestinal tract is multifactorial and involves several bacterial proteins, with other macromolecules possibly playing direct or indirect roles in attachment [5]. So far, only a few candidate proteins have been identified with probable or proven adhesin functions, binding either to extracellular matrix components or to gastrointestinal cells. However, when isogenic mutants have been constructed, they have failed to reveal a role for the putative adhesin in adherence to host cells [11, 36].

Molecules of *C. difficile* currently proposed to be involved in adhesion include surface-layer proteins, such as P36 and P47 [37, 38]; flagellar proteins [10]; cell wall proteins (cwp66 [39] and cwp84 [40]); Fbp68, a fibronectin binding protein [8]; heat shock protein GroEL [9]; and, more recently, a collagen binding



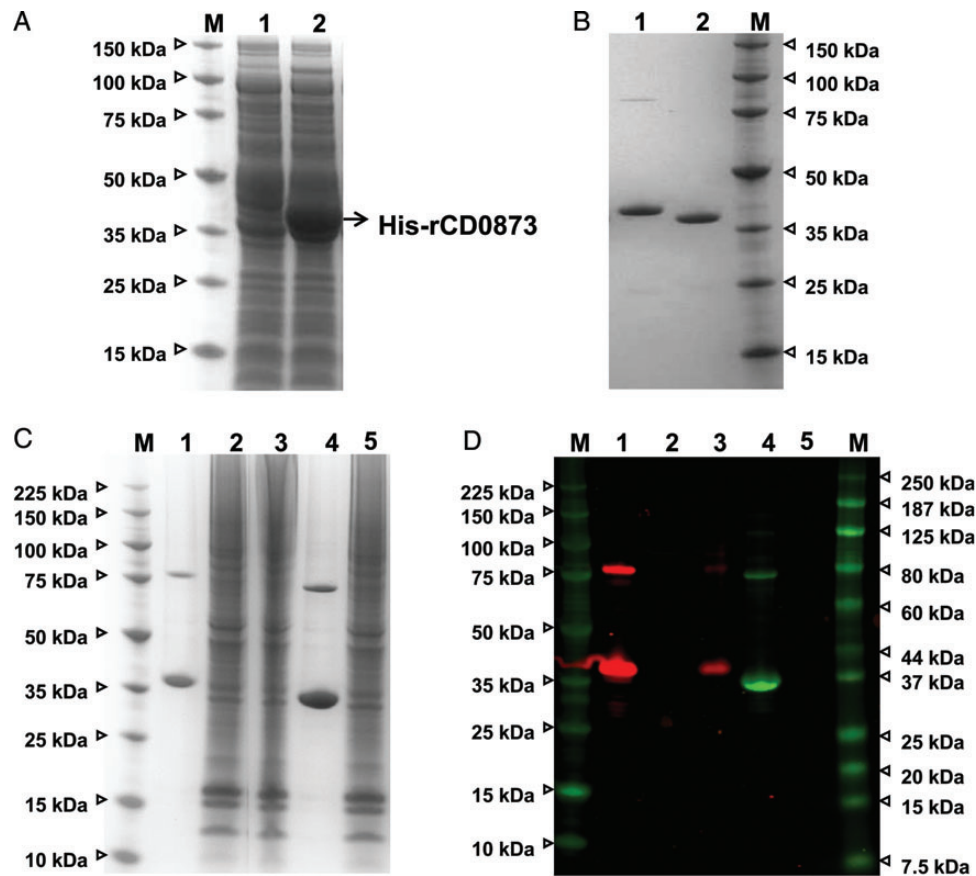

**Figure 6.** The recombinant CD0873 protein binds to Caco-2 cells. *A*, Expression of the recombinant CD0873 protein in *Escherichia coli* C43(DE3) by IPTG induction. Proteins of the *Escherichia coli* C43(DE3) cell lysates (lane 1, uninduced control; lane 2, induction of the protein expression with IPTG) were separated by sodium dodecyl sulfate–polyacrylamide gel electrophoresis (SDS-PAGE) and stained with SimplyBlue SafeStain. M, protein molecular weight marker (in kDa). *B*, SDS-PAGE of the purified recombinant CD0873 protein. Following induction of protein expression with IPTG, the histidine-tagged recombinant protein was purified (lane 1), and the histidine tag was removed by treating the purified protein with TEV protease (lane 2). *C*, Loading control of the protein binding assay. Caco-2 cells ( $7 \times 10^5$ ) were incubated with 100  $\mu$ g of recombinant CD0873 protein for 2 hours (no protein and recombinant  $\epsilon$  prototoxin of *Clostridium perfringens* served as negative controls), the cells were then washed, and the proteins of the Caco-2 cell lysates that were analyzed for protein binding were separated by SDS-PAGE and stained with SimplyBlue SafeStain. *D*, CD0873 immunoblot of Caco-2 cell lysates by Western blotting, using rabbit anti-CD0873 antibodies (dilution, 1:2500). The control  $\epsilon$  prototoxin was detected by mouse anti-His antibodies. The Caco-2 cells were bound by the recombinant CD0873 protein but not by the control protein. Lane 1, recombinant CD0873 protein; lane 2, lysate of Caco-2 cells plus no protein (negative control); lane 3, lysate of Caco-2 cells plus recombinant CD0873 protein; lane 4, recombinant  $\epsilon$  prototoxin of *C. perfringens*; lane 5, lysate of Caco-2 cells plus recombinant  $\epsilon$  prototoxin of *C. perfringens* (washing control); M, protein molecular weight marker (in kDa).

protein [11]. Interestingly, absence of flagellar components (FliC and FliD) increases the in vitro adherence of *C. difficile* to intestinal Caco-2 cells. In contrast, it has been shown that *fliC* and *fliD* knockout mutants colonize the cecum at the same rate as the wild-type strain in a hamster infection model [27]. Thus, the role of flagella in adherence is currently unclear. Although it has been shown that *C. difficile* possesses a functional collagen binding protein, CbpA, mutation of *cbpA* failed to result in a reduction in adherence to IMR-90 cells, indicating that other factors of *C. difficile* may be involved in adhesion [11].

In other bacterial pathogens, lipoproteins have been shown to be essential adhesins and colonization factors [20, 41], with

several of these classified as solute binding lipoproteins of ABC-type transport systems. Bioinformatic analysis led us to study the CD0873 protein, a polypeptide containing a lipoprotein signal peptide cleavage motif at its N-terminus and annotated as a sugar-family extracellular solute-binding lipoprotein of an ABC transport system. Partitioning of CD0873 to the detergent phase following a Triton X-114 phase extraction supports the annotation of this protein as a lipoprotein. Our immunofluorescence microscopy data reveal that CD0873 is surface exposed, probably anchored to the cell membrane through the attached acyl moieties. It has been proposed that the ability of lipoproteins to be N-terminus anchored to a

lipid bilayer and simultaneously exposed on the surface of a bacterium is due to the presence of an extended N-terminus region, which, in gram-negative bacteria, can span the lipooligosaccharide layer [42].

The operon CD0875-CD0873, encoding for an ABC-type transporter, is highly conserved and present in all *C. difficile* strains for which genome sequence data are available. This operon shares the same genetic arrangement as the *psaBCA* operon that encodes for the streptococcal lipoprotein PsaA. This multifunctional protein is a major adhesin of *S. pneumoniae*, as well as a manganese ion transporter [43]. As to the function of CD0873, the protein has been annotated as an ABC transporter sugar-family extracellular solute-binding lipoprotein. Elucidation of the structure of CD0873 will aid in defining the role of this lipoprotein's function because of the possibility that CD0873 may share some functional similarity to the lipoprotein PsaA, owing to the conservation of some amino acids involved in manganese binding. Interestingly, expression of CD0874 was upregulated during infection of Caco-2 cells, suggesting that this operon maybe important in the interaction with enterocytes [35].

This latter finding directed us to generate a *C. difficile* mutant defective in CD0873 expression. On confirmation of this phenotype, we demonstrated that the mutant was unable to adhere to Caco-2 cells, suggesting that this protein may, similar to PsaA, function as an adhesin. Caco-2 cells are human colonic adenocarcinoma cells that differentiate spontaneously under standard culture conditions and resemble many in vivo characteristics of enterocytes [44]. Therefore, this cell line is commonly used as a validated human intestinal cell model for in vitro studies of host-pathogen interactions [41, 45], including those involving *C. difficile* and humans [46, 47]

More importantly, this finding is the first demonstration of a genetic deletion resulting in a clear reduction of *C. difficile* adherence in vitro. Furthermore, we could restore adherence by complementation, as evidenced by immunofluorescence microscopy (complementation in the as CFU assay was irreproducible, perhaps because of the different nature of this assay). This observation did not preclude the possibility that the lack of CD0873 may have an indirect effect on adhesion. To address this, we demonstrated that antibodies against the surface-exposed CD0873 could inhibit adherence. To further demonstrate that CD0873 is a bona fide adhesin, we used recombinant CD0873 in a direct binding assay to show that the protein has an intrinsic ability to interact with Caco-2 cells. Recently, it has been proposed that spores adhere to Caco-2 cells [48]. Given that CD0873 has been shown to be localized to the surface of spores [49], it raises the possibility that CD0873 might also play an important role during the early stages of colonization.

Given the lack of an effective toxin-based vaccine for *C. difficile*, the identification of novel factors key to the pathogenesis of this disease is essential. CD0873 has previously been

identified as immunogenic in 3 of 6 patients infected with *C. difficile*, although no data relating to the severity of their infection were reported [50]. It would be of interest to look at a larger panel of patients with well-documented clinical findings to determine whether a high serum antibody response to CD0873 correlates with protection. Nevertheless, the data presented here support the hypothesis that CD0873 is a lipoprotein of *C. difficile* with a role in adherence. The finding that antibodies against CD0873 can inhibit adhesion raises the possibility that this protein could be a target for therapeutic intervention.

## Notes

**Financial support.** This work was supported by the European Union Seventh Framework Programme (EU MCN Grant agreement 237942).

**Potential conflicts of interest.** All authors: No reported conflicts.

All authors have submitted the ICMJE Form for Disclosure of Potential Conflicts of Interest. Conflicts that the editors consider relevant to the content of the manuscript have been disclosed.

## References

1. Viswanathan VK, Mallozzi MJ, Vedantam G. *Clostridium difficile* infection: An overview of the disease and its pathogenesis, epidemiology and interventions. *Gut Microbes* **2010**; 1:234–42.
2. Warny M, Pepin J, Fang A, et al. Toxin production by an emerging strain of *Clostridium difficile* associated with outbreaks of severe disease in North America and Europe. *Lancet* **2005**; 366:1079–84.
3. Kyne L, Hamel MB, Polavaram R, Kelly CP. Health care costs and mortality associated with nosocomial diarrhea due to *Clostridium difficile*. *Clin Infect Dis* **2002**; 34:346–53.
4. Poxton IR, McCoubrey J, Blair G. The pathogenicity of *Clostridium difficile*. *Clin Microbiol Infect* **2001**; 7:421–7.
5. Rupnik M, Wilcox MH, Gerding DN. *Clostridium difficile* infection: new developments in epidemiology and pathogenesis. *Nat Rev Microbiol* **2009**; 7:526–36.
6. Schwan C, Stecher B, Tzivelekidis T, et al. *Clostridium difficile* toxin CDT induces formation of microtubule-based protrusions and increases adherence of bacteria. *PLoS Pathog* **2009**; 5:e1000626.
7. Sambol SP, Merrigan MM, Tang JK, Johnson S, Gerding DN. Colonization for the prevention of *Clostridium difficile* disease in hamsters. *J Infect Dis* **2002**; 186:1781–9.
8. Hennequin C, Janoir C, Barc MC, Collignon A, Karjalainen T. Identification and characterization of a fibronectin-binding protein from *Clostridium difficile*. *Microbiol* **2003**; 149:2779–87.
9. Hennequin C, Porcheray F, Waligora-Dupriet A, et al. GroEL (Hsp60) of *Clostridium difficile* is involved in cell adherence. *Microbiol* **2001**; 147:87–96.
10. Tasteyre A, Barc MC, Collignon A, Boureau H, Karjalainen T. Role of FliC and FliD flagellar proteins of *Clostridium difficile* in adherence and gut colonization. *Infect Immun* **2001**; 69:7937–40.
11. Tulli L, Marchi S, Petracca R, et al. CbpA: a novel surface exposed adhesin of *Clostridium difficile* targeting human collagen. *Cell Microbiol* **2013**; 15:1674–87.
12. Tamura GS, Nittayajarn A, Schoentag DL. A glutamine transport gene, *glnQ*, is required for fibronectin adherence and virulence of group B streptococci. *Infect Immun* **2002**; 70:2877–85.
13. Castaneda-Roldan EL, Ouahrani-Bettache S, Saldana Z, et al. Characterization of SP41, a surface protein of *Brucella* associated with adherence and invasion of host epithelial cells. *Cell Microbiol* **2006**; 8:1877–87.
14. Matthyse AG, Yarnall HA, Young N. Requirement for genes with homology to ABC transport systems for attachment and virulence of *Agrobacterium tumefaciens*. *J Bacteriol* **1996**; 178:5302–8.

15. Lu YJ, Forte S, Thompson CM, Anderson PW, Malley R. Protection against Pneumococcal colonization and fatal pneumonia by a trivalent conjugate of a fusion protein with the cell wall polysaccharide. *Infect Immun* **2009**; 77:2076–83.
16. Cron LE, Bootsma HJ, Noske N, Burghout P, Hammerschmidt S, Hermans PW. Surface-associated lipoprotein PpMA of *Streptococcus pneumoniae* is involved in colonization in a strain-specific manner. *Microbiol* **2009**; 155:2401–10.
17. Hermans PW, Adrian PV, Albert C, et al. The streptococcal lipoprotein rotamase A (SlrA) is a functional peptidyl-prolyl isomerase involved in pneumococcal colonization. *J Biol Chem* **2006**; 281:968–76.
18. Blevins JS, Hagman KE, Norgard MV. Assessment of decorin-binding protein A to the infectivity of *Borrelia burgdorferi* in the murine models of needle and tick infection. *BMC Microbiol* **2008**; 8:82.
19. Verma A, Brissette CA, Bowman A, Stevenson B. *Borrelia burgdorferi* BmpA is a laminin-binding protein. *Infect Immun* **2009**; 77:4940–6.
20. Neelakanta G, Li X, Pal U, et al. Outer surface protein B is critical for *Borrelia burgdorferi* adherence and survival within Ixodes ticks. *PLoS Pathog* **2007**; 3:e33.
21. Guglielmetti S, Tamagnini I, Mora D, et al. Implication of an outer surface lipoprotein in adhesion of *Bifidobacterium bifidum* to Caco-2 cells. *App Environ Microbiol* **2008**; 74:4695–702.
22. Lee KJ, Lee NY, Han YS, Kim J, Lee KH, Park SJ. Functional characterization of the IIPa protein of *Vibrio vulnificus* as an adhesin and its role in bacterial pathogenesis. *Infect Immun* **2010**; 78:2408–17.
23. Kovacs-Simon A, Titball RW, Michell SL. Lipoproteins of bacterial pathogens. *Infect Immun* **2011**; 79:548–61.
24. Sigrist CJ, Cerutti L, de Castro E, et al. PROSITE, a protein domain database for functional characterization and annotation. *Nucleic Acids Res* **2010**; 38:D161–6.
25. Bendtsen JD, Nielsen H, von Heijne G, Brunak S. Improved prediction of signal peptides: SignalP 3.0. *J Mol Biol* **2004**; 340:783–95.
26. Hussain HA, Roberts AP, Mullany P. Generation of an erythromycin-sensitive derivative of *Clostridium difficile* strain 630 (630Deltaerm) and demonstration that the conjugative transposon Tn916DeltaE enters the genome of this strain at multiple sites. *J Med Microbiol* **2005**; 54:137–41.
27. Dingle TC, Mulvey GL, Armstrong GD. Mutagenic analysis of the *Clostridium difficile* flagellar proteins, FliC and FliD, and their contribution to virulence in hamsters. *Infect Immun* **2011**; 79:4061–7.
28. Miroux B, Walker JE. Over-production of proteins in *Escherichia coli*: mutant hosts that allow synthesis of some membrane proteins and globular proteins at high levels. *J Mol Biol* **1996**; 260:289–98.
29. Purdy D, O’Keeffe TA, Elmore M, et al. Conjugative transfer of clostridial shuttle vectors from *Escherichia coli* to *Clostridium difficile* through circumvention of the restriction barrier. *Mol Microbiol* **2002**; 46:439–52.
30. Stols L, Gu M, Dieckman L, Raffin R, Collart FR, Donnelly MI. A new vector for high-throughput, ligation-independent cloning encoding a tobacco etch virus protease cleavage site. *Prot Expr Purif* **2002**; 25:8–15.
31. Heap JT, Kuehne SA, Ehsaan M, et al. The Clostron: Mutagenesis in *Clostridium* refined and streamlined. *J Microbiol Meth* **2010**; 80:49–55.
32. Fagan RP, Fairweather NF. *Clostridium difficile* has two parallel and essential Sec secretion systems. *J Biol Chem* **2011**; 286:27483–93.
33. Bordier C. Phase separation of integral membrane proteins in Triton X-114 solution. *The J Biol Chem* **1981**; 256:1604–7.
34. Heap JT, Pennington OJ, Cartman ST, Carter GP, Minton NP. The Clostron: a universal gene knock-out system for the genus *Clostridium*. *J Microbiol Method* **2007**; 70:452–64.
35. Janvilisri T, Scaria J, Chang YF. Transcriptional profiling of *Clostridium difficile* and Caco-2 cells during infection. *J Infect Dis* **2010**; 202:282–90.
36. Barketi-Klai A, Hoys S, Lambert-Bordes S, Collignon A, Kansau I. Role of fibronectin-binding protein A in *Clostridium difficile* intestinal colonization. *J Medical Microbiol* **2011**; 60:1155–61.
37. Calabi E, Calabi F, Phillips AD, Fairweather NF. Binding of *Clostridium difficile* surface layer proteins to gastrointestinal tissues. *Infect Immun* **2002**; 70:5770–8.
38. Karjalainen T, Waligora-Dupriet AJ, Cerquetti M, et al. Molecular and genomic analysis of genes encoding surface-anchored proteins from *Clostridium difficile*. *Infect Immun* **2001**; 69:3442–6.
39. Waligora AJ, Hennequin C, Mullany P, Bourlioux P, Collignon A, Karjalainen T. Characterization of a cell surface protein of *Clostridium difficile* with adhesive properties. *Infect Immun* **2001**; 69:2144–53.
40. Janoir C, Pechine S, Grosdidier C, Collignon A. Cwp84, a surface-associated protein of *Clostridium difficile*, is a cysteine protease with degrading activity on extracellular matrix proteins. *J Bacteriol* **2007**; 189:7174–80.
41. Guglielmetti S, Tamagnini I, Minuzzo M, et al. Study of the adhesion of *Bifidobacterium bifidum* MIMBb75 to human intestinal cell lines. *Curr Microbiol* **2009**; 59:167–72.
42. Mascioni A, Moy FJ, McNeil LK, et al. NMR dynamics and antibody recognition of the meningococcal lipidated outer membrane protein LP2086 in micellar solution. *Biochim Biophys Acta* **2010**; 1798:87–93.
43. Rajam G, Anderton JM, Carlone GM, Sampson JS, Ades EW. Pneumococcal surface adhesin A (PsaA): a review. *Crit Rev Microbiol* **2008**; 34:163–73.
44. Rousset M. The human colon carcinoma cell lines HT-29 and Caco-2: two *in vitro* models for the study of intestinal differentiation. *Biochimie* **1986**; 68:1035–40.
45. Tuomola EM, Salminen SJ. Adhesion of some probiotic and dairy *Lactobacillus* strains to Caco-2 cell cultures. *Int J Food Microbiol* **1998**; 41:45–51.
46. Eveillard M, Fourel V, Barc MC, et al. Identification and characterization of adhesive factors of *Clostridium difficile* involved in adhesion to human colonic enterocyte-like Caco-2 and mucus-secreting HT29 cells in culture. *Mol Microbiol* **1993**; 7:371–81.
47. Naaber P, Lehto E, Salminen S, Mikelsaar M. Inhibition of adhesion of *Clostridium difficile* to Caco-2 cells. *FEMS Immunol Med Micro* **1996**; 14:205–9.
48. Paredes-Sabja D, Sarker MR. Adherence of *Clostridium difficile* spores to Caco-2 cells in culture. *J Med Microbiol* **2012**; 61:1208–18.
49. Lawley TD, Croucher NJ, Yu L, et al. Proteomic and genomic characterization of highly infectious *Clostridium difficile* 630 spores. *J Bacteriol* **2009**; 191:5377–86.
50. Wright A, Drudy D, Kyne L, Brown K, Fairweather NF. Immunoreactive cell wall proteins of *Clostridium difficile* identified by human sera. *J Med Microbiol* **2008**; 57:750–6.
